# Supplementary material for: The Bph45 Gene Confers Resistance against Brown Planthopper in Rice by Reducing the Production of Limonene
Source: MDPI journal article supplement (doi:10.3390/ijms24021798), 2023-01-16
Supplement: s1 [file s1]

**Table S1. Differential VOCs between TNG71 and TNG71-Bph45 revealed by GC-MS.**

| Name of compound <sup>a</sup>                | Retention time (min) | Relative amount in each TNG71 experiment (%) |                 |                 |                 |                 | Count in TNG71 | Avg. amount (%) in TNG71 | Relative amount in each TNG71-Bph45 experiment (%) |                 |                 |                 |                 | Count in TNG71-Bph45 | Avg. amount (%) in TNG71-Bph45 | p value (Student's unpaired t-test) | Summary (x indicates no differences between two lines); <b>blue font</b> indicates a difference |
|----------------------------------------------|----------------------|----------------------------------------------|-----------------|-----------------|-----------------|-----------------|----------------|--------------------------|----------------------------------------------------|-----------------|-----------------|-----------------|-----------------|----------------------|--------------------------------|-------------------------------------|-------------------------------------------------------------------------------------------------|
|                                              |                      | #1 <sup>b</sup>                              | #2 <sup>b</sup> | #3 <sup>b</sup> | #4 <sup>b</sup> | #5 <sup>b</sup> |                |                          | #1 <sup>b</sup>                                    | #2 <sup>b</sup> | #3 <sup>b</sup> | #4 <sup>b</sup> | #5 <sup>b</sup> |                      |                                |                                     |                                                                                                 |
| Carbamic acid, monoammonium salt             | 0.86                 | 0.00                                         | 3.31            | 0.00            | 0.00            | 0.00            | 1              | 3.31                     | 0.00                                               | 4.05            | 6.33            | 5.62            | 5.59            | 4                    | 5.40                           | 0.0243                              | significantly more in TNG71-Bph45                                                               |
| Acetone                                      | 1.57                 | 1.65                                         | 2.02            | 5.66            | 2.21            | 2.92            | 5              | 2.89                     | 1.10                                               | 3.17            | 6.40            | 2.45            | 5.61            | 5                    | 3.75                           | 0.5036                              | x                                                                                               |
| Acetic acid                                  | 2.31                 | 1.01                                         | 0.00            | 2.86            | 1.35            | 1.41            | 4              | 1.66                     | 0.00                                               | 0.00            | 0.00            | 1.02            | 1.68            | 2                    | 1.35                           | 0.2105                              | x                                                                                               |
| Cyclopentane, methyl-                        | 2.95                 | 0.46                                         | 0.00            | 0.00            | 0.00            | 0.00            | 1              | 0.46                     | 0.00                                               | 6.70            | 15.42           | 0.00            | 1.48            | 3                    | 7.87                           | 0.1548                              | x                                                                                               |
| Isopropoxycarbamic acid, ethyl ester         | 4.16                 | 0.00                                         | 1.05            | 0.00            | 0.00            | 0.00            | 1              | 1.05                     | 1.38                                               | 2.34            | 0.00            | 0.00            | 0.00            | 2                    | 1.86                           | 0.3368                              | x                                                                                               |
| Furan, 2-ethyl-                              | 4.61                 | 0.00                                         | 1.02            | 1.13            | 0.00            | 0.00            | 2              | 1.08                     | 0.00                                               | 0.00            | 0.00            | 0.00            | 0.90            | 1                    | 0.90                           | 0.4572                              | x                                                                                               |
| 3-Pentanone                                  | 4.65                 | 1.59                                         | 1.78            | 1.39            | 0.00            | 0.00            | 3              | 1.59                     | 0.90                                               | 2.07            | 3.92            | 0.00            | 1.42            | 4                    | 1.66                           | 0.3836                              | x                                                                                               |
| 2,5-Dimethylfuran                            | 5.01                 | 1.44                                         | 0.90            | 1.00            | 0.58            | 0.00            | 4              | 0.98                     | 1.11                                               | 0.62            | 0.00            | 0.99            | 0.52            | 4                    | 0.81                           | 0.6732                              | x                                                                                               |
| Toluene                                      | 7.42                 | 6.94                                         | 5.14            | 5.90            | 3.96            | 4.00            | 5              | 5.19                     | 4.61                                               | 3.87            | 6.40            | 3.08            | 3.21            | 5                    | 4.23                           | 0.2851                              | x                                                                                               |
| 3-Methylthiophene                            | 7.97                 | 2.73                                         | 1.51            | 3.04            | 2.23            | 2.13            | 5              | 2.33                     | 0.00                                               | 0.00            | 0.00            | 0.00            | 0.00            | 0                    | 0.00                           | 0.0000                              | specific to TNG71                                                                               |
| Methyl 2-methylbutyrate                      | 8.09                 | 0.00                                         | 0.00            | 0.00            | 0.00            | 0.00            | 0              | 0.00                     | 3.35                                               | 2.82            | 3.63            | 3.44            | 2.94            | 5                    | 3.24                           | 0.0000                              | specific to TNG71-Bph45                                                                         |
| 4-Pentenal, 2-methyl-                        | 8.85                 | 1.42                                         | 1.97            | 0.00            | 0.00            | 0.00            | 2              | 1.70                     | 0.82                                               | 0.00            | 0.00            | 0.00            | 0.00            | 1                    | 0.82                           | 0.2902                              | x                                                                                               |
| 3-Hexenal                                    | 9.05                 | 0.00                                         | 0.00            | 0.95            | 0.00            | 0.00            | 1              | 0.95                     | 0.00                                               | 0.97            | 0.00            | 0.00            | 1.44            | 2                    | 1.20                           | 0.4388                              | x                                                                                               |
| 2-Hexenal or 3-Hexen-1-ol, (E)-              | 11.55                | 6.05                                         | 8.15            | 4.99            | 4.07            | 1.74            | 5              | 5.00                     | 1.96                                               | 0.63            | 1.43            | 3.10            | 3.45            | 5                    | 2.11                           | 0.0404                              | significantly more in TNG71                                                                     |
| Ethylbenzene                                 | 11.80                | 1.77                                         | 2.01            | 1.47            | 2.33            | 1.80            | 5              | 1.88                     | 0.93                                               | 0.89            | 1.22            | 1.83            | 1.12            | 5                    | 1.20                           | 0.0154                              | significantly more in TNG71                                                                     |
| p-Xylene                                     | 12.18                | 6.30                                         | 0.00            | 0.00            | 9.94            | 9.13            | 3              | 8.46                     | 4.35                                               | 3.86            | 6.23            | 8.71            | 3.67            | 5                    | 5.37                           | 0.9042                              | x                                                                                               |
| 2-Heptanone <sup>c</sup>                     | 13.16                | 3.66                                         | 5.23            | 4.07            | 2.42            | 2.98            | 5              | 3.67                     | 12.91                                              | 11.99           | 9.11            | 2.00            | 4.90            | 5                    | 8.18                           | 0.0679                              | x                                                                                               |
| o-Xylene                                     | 13.28                | 4.49                                         | 0.00            | 0.00            | 4.73            | 3.98            | 3              | 4.40                     | 0.00                                               | 0.00            | 0.00            | 4.76            | 0.00            | 1                    | 4.76                           | 0.2760                              | x                                                                                               |
| 2-Heptanol <sup>c</sup>                      | 13.60                | 2.66                                         | 3.11            | 1.84            | 0.00            | 0.00            | 3              | 2.54                     | 3.38                                               | 3.53            | 2.48            | 0.00            | 2.12            | 4                    | 2.88                           | 0.4165                              | x                                                                                               |
| (1R)-2,6,6-Trimethylbicyclo[3.1.1]hept-2-ene | 15.14                | 0.00                                         | 0.49            | 1.19            | 0.00            | 0.91            | 3              | 0.86                     | 0.89                                               | 0.89            | 2.19            | 1.71            | 2.45            | 5                    | 1.63                           | 0.0247                              | x                                                                                               |
| Octane, 2,2,6-trimethyl-                     | 16.29                | 2.38                                         | 0.00            | 0.00            | 2.78            | 3.35            | 3              | 2.83                     | 1.65                                               | 0.00            | 0.00            | 2.84            | 0.00            | 2                    | 2.25                           | 0.4082                              | x                                                                                               |
| 5-Hepten-2-one, 6-methyl-beta.-Myrcene       | 17.53                | 1.03                                         | 0.71            | 0.77            | 1.71            | 2.15            | 5              | 1.27                     | 0.77                                               | 1.04            | 1.13            | 1.52            | 2.06            | 5                    | 1.30                           | 0.9359                              | x                                                                                               |
| Mesitylene                                   | 17.69                | 1.81                                         | 2.34            | 1.14            | 1.27            | 1.49            | 5              | 1.61                     | 3.31                                               | 1.21            | 0.00            | 1.54            | 1.02            | 4                    | 1.77                           | 0.7475                              | x                                                                                               |
| Tridecane                                    | 17.84                | 1.97                                         | 0.00            | 1.57            | 0.00            | 0.00            | 2              | 1.77                     | 0.00                                               | 1.05            | 2.20            | 0.00            | 1.63            | 3                    | 1.63                           | 0.6759                              | x                                                                                               |
| Octanal                                      | 18.01                | 0.00                                         | 0.00            | 0.00            | 0.00            | 1.09            | 1              | 0.55                     | 0.55                                               | 0.00            | 0.00            | 0.76            | 0.00            | 2                    | 0.66                           | 0.8744                              | x                                                                                               |
| Decane, 2,2-dimethyl-                        | 18.20                | 0.96                                         | 0.00            | 0.00            | 0.00            | 0.88            | 2              | 0.92                     | 0.00                                               | 0.58            | 0.00            | 0.81            | 0.00            | 2                    | 0.69                           | 0.7567                              | x                                                                                               |
| Benzene                                      | 19.04                | 0.00                                         | 0.71            | 0.00            | 1.07            | 0.00            | 2              | 0.89                     | 0.64                                               | 0.00            | 0.00            | 1.08            | 0.51            | 3                    | 0.74                           | 0.7754                              | x                                                                                               |
| Benzenes                                     | 19.18                | 2.34                                         | 3.38            | 1.48            | 4.14            | 3.75            | 5              | 3.02                     | 3.23                                               | 0.73            | 0.00            | 2.84            | 1.00            | 4                    | 1.95                           | 0.1039                              | x                                                                                               |
| Limonene                                     | 19.36                | 6.16                                         | 7.84            | 6.76            | 9.80            | 8.49            | 5              | 7.81                     | 4.97                                               | 2.62            | 1.82            | 5.32            | 3.41            | 5                    | 3.63                           | 0.0020                              | significantly more in TNG71                                                                     |
| 3-Methyl-5-propylnonane                      | 19.52                | 0.77                                         | 1.27            | 2.23            | 0.00            | 1.22            | 4              | 1.37                     | 0.00                                               | 0.00            | 0.00            | 0.00            | 0.00            | 0                    | 0.00                           | 0.0164                              | specific to TNG71                                                                               |
| Eucalyptol                                   | 19.52                | 0.00                                         | 0.00            | 0.00            | 0.00            | 0.00            | 0              | 0.00                     | 2.45                                               | 2.34            | 2.54            | 0.00            | 4.35            | 4                    | 2.92                           | 0.0097                              | specific to TNG71-Bph45                                                                         |
| 2,5-Hexanedione, 3,4-dimethyl-               | 19.86                | 1.43                                         | 1.51            | 1.54            | 1.75            | 1.89            | 5              | 1.62                     | 0.00                                               | 1.34            | 1.08            | 1.51            | 1.66            | 4                    | 1.40                           | 0.1389                              | x                                                                                               |
| 1-Octen-3-ol                                 | 20.51                | 0.00                                         | 2.42            | 0.00            | 0.00            | 0.00            | 1              | 2.42                     | 1.64                                               | 2.37            | 0.00            | 0.00            | 3.98            | 3                    | 2.66                           | 0.2491                              | x                                                                                               |
| Undecane, 6-methyl-                          | 21.82                | 0.00                                         | 0.00            | 0.00            | 0.66            | 1.00            | 2              | 0.83                     | 0.00                                               | 0.00            | 0.00            | 0.88            | 0.00            | 1                    | 0.88                           | 0.5825                              | x                                                                                               |
| 2-Nonanone                                   | 21.93                | 2.85                                         | 3.30            | 2.96            | 1.51            | 2.39            | 5              | 2.60                     | 4.40                                               | 3.25            | 1.79            | 1.99            | 2.73            | 5                    | 2.83                           | 0.6934                              | x                                                                                               |
| Linalool <sup>d</sup>                        | 22.24                | 4.09                                         | 5.52            | 18.4            | 1.45            | 2.24            | 5              | 6.34                     | 6.62                                               | 10.69           | 5.66            | 2.58            | 4.84            | 5                    | 6.08                           | 0.9399                              | x                                                                                               |
| Nonanal                                      | 22.43                | 1.56                                         | 1.02            | 1.55            | 1.59            | 1.66            | 5              | 1.47                     | 0.77                                               | 1.13            | 0.75            | 1.60            | 1.56            | 5                    | 1.16                           | 0.1860                              | x                                                                                               |
| 2,5-Dihydroxybenzaldehyde                    | 22.66                | 0.75                                         | 1.57            | 1.06            | 0.69            | 1.20            | 5              | 1.05                     | 0.55                                               | 0.53            | 0.00            | 0.74            | 0.00            | 3                    | 0.61                           | 0.0146                              | x                                                                                               |
| (E)-4,8-Dimethylnona-1,3,7-triene            | 22.90                | 8.08                                         | 8.71            | 9.20            | 7.54            | 9.98            | 5              | 8.70                     | 5.96                                               | 5.74            | 0.00            | 7.21            | 5.97            | 4                    | 6.22                           | 0.0240                              | significantly more in TNG71                                                                     |
| 13-Methyltetradecanal                        | 24.99                | 0.46                                         | 0.00            | 0.00            | 1.10            | 0.00            | 2              | 0.78                     | 0.00                                               | 0.00            | 0.00            | 1.02            | 0.00            | 1                    | 1.02                           | 0.7239                              | x                                                                                               |
| Benzoic acid, ethyl ester                    | 25.15                | 2.83                                         | 2.97            | 1.88            | 0.00            | 0.00            | 3              | 2.56                     | 3.22                                               | 1.72            | 2.84            | 0.00            | 0.00            | 3                    | 2.59                           | 0.9821                              | x                                                                                               |
| Methyl salicylate                            | 26.12                | 6.74                                         | 6.18            | 5.45            | 1.93            | 1.80            | 5              | 4.42                     | 5.73                                               | 6.97            | 3.53            | 3.25            | 3.82            | 5                    | 4.66                           | 0.8558                              | x                                                                                               |
| Decanal                                      | 26.35                | 3.46                                         | 1.77            | 1.82            | 4.28            | 4.09            | 5              | 3.08                     | 1.65                                               | 2.20            | 1.69            | 4.54            | 3.40            | 5                    | 2.69                           | 0.6306                              | x                                                                                               |
| Cyclohexasiloxane, dodecamethyl-             | 30.49                | 0.00                                         | 1.49            | 1.00            | 3.63            | 2.75            | 4              | 2.22                     | 0.55                                               | 0.00            | 0.00            | 2.93            | 2.60            | 3                    | 2.03                           | 0.5549                              | x                                                                                               |
| Copaene                                      | 32.64                | 0.79                                         | 0.86            | 1.31            | 1.83            | 2.18            | 5              | 1.39                     | 0.81                                               | 0.53            | 1.08            | 0.95            | 1.21            | 5                    | 0.92                           | 0.1445                              | x                                                                                               |
| Tetradecane                                  | 33.04                | 1.22                                         | 2.05            | 1.77            | 2.04            | 2.48            | 5              | 1.91                     | 1.20                                               | 1.45            | 0.00            | 0.00            | 2.58            | 3                    | 1.74                           | 0.1395                              | x                                                                                               |
| Caryophyllene <sup>d</sup>                   | 34.18                | 0.57                                         | 1.14            | 1.43            | 3.85            | 2.81            | 5              | 1.96                     | 0.83                                               | 0.57            | 1.48            | 2.63            | 2.28            | 5                    | 1.56                           | 0.5915                              | x                                                                                               |
| cis- alpha -Bergamotene                      | 34.51                | 0.00                                         | 0.00            | 0.00            | 0.98            | 0.00            | 1              | 0.98                     | 0.58                                               | 0.00            | 0.89            | 0.97            | 0.00            | 3                    | 0.81                           | 0.3376                              | x                                                                                               |
| 5,9-Undecadien-2-one                         | 34.90                | 0.00                                         | 0.00            | 0.00            | 0.00            | 1.17            | 1              | 1.17                     | 0.00                                               | 0.55            | 0.00            | 0.00            | 0.49            | 2                    | 0.52                           | 0.9238                              | x                                                                                               |
| 1,4,7,-Cycloundecatriene                     | 35.30                | 0.00                                         | 0.00            | 0.00            | 0.87            | 1.17            | 2              | 1.02                     | 0.00                                               | 0.00            | 0.00            | 0.80            | 0.00            | 1                    | 0.80                           | 0.4345                              | x                                                                                               |
| Benzene                                      | 35.89                | 1.12                                         | 1.07            | 0.00            | 1.73            | 1.91            | 4              | 1.46                     | 1.75                                               | 0.70            | 1.31            | 2.78            | 0.98            | 5                    | 1.50                           | 0.5172                              | x                                                                                               |
| 2,4-Di-tert-butylphenol                      | 36.55                | 0.59                                         | 0.00            | 0.00            | 0.00            | 0.51            | 2              | 0.55                     | 0.00                                               | 0.00            | 2.29            | 0.00            | 0.87            | 2                    | 1.58                           | 0.4057                              | x                                                                                               |
| gamma -Murolene                              | 36.86                | 0.00                                         | 0.00            | 0.00            | 0.00            | 0.92            | 1              | 0.92                     | 1.29                                               | 0.00            | 0.94            | 1.86            | 1.08            | 4                    | 1.29                           | 0.0429                              | significantly more in TNG71-Bph45                                                               |
| Naphthalene                                  | 37.05                | 0.00                                         | 0.00            | 0.00            | 1.64            | 0.00            | 1              | 0.55                     | 3.23                                               | 1.08            | 2.21            | 4.36            | 2.72            | 5                    | 2.72                           | 0.0055                              | significantly more in TNG71-Bph45                                                               |
| Nonadecane                                   | 38.29                | 0.60                                         | 0.56            | 0.00            | 3.39            | 0.00            | 3              | 1.52                     | 0.00                                               | 0.00            | 0.00            | 0.00            | 0.00            | 0                    | 0.00                           | 0.1888                              | specific to TNG71                                                                               |
| Cyclooctasiloxane, hexadecamethyl-           | 39.38                | 0.58                                         | 1.29            | 0.00            | 0.00            | 0.00            | 2              | 0.93                     | 0.00                                               | 0.00            | 0.00            | 1.08            | 0.00            | 1                    | 1.08                           | 0.6509                              | x                                                                                               |
| Heptadecane, 2-methyl-                       | 39.96                | 2.70                                         | 2.64            | 1.17            | 0.00            | 3.41            | 4              | 2.48                     | 0.00                                               | 1.22            | 0.00            | 0.00            | 0.00            | 1                    | 1.22                           | 0.0302                              | significantly more in TNG71                                                                     |
| Eicosane                                     | 40.17                | 0.00                                         | 0.00            | 0.00            | 1.95            | 0.00            | 1              | 1.95                     | 3.50                                               | 0.00            | 0.00            | 0.00            | 0.76            | 2                    | 2.13                           | 0.5708                              | x                                                                                               |
| 2-Pentadecanone, 6,10,14-trimethyl-          | 42.00                | 0.00                                         | 0.00            | 0.00            | 1.02            | 1.00            | 2              | 1.01                     | 0.45                                               | 0.00            | 0.00            | 0.89            | 0.00            | 2                    | 0.67                           | 0.6696                              | x                                                                                               |
| Total %                                      |                      | 100                                          | 100             | 100             | 100             | 100             |                |                          | 100                                                | 100             | 100             | 100             | 100             |                      |                                |                                     |                                                                                                 |

<sup>a</sup> Compounds that appeared only once in ten GC-MS analyses or twice but just once in each side were removed. Compounds present at amounts less than 1% in both original samples were also removed.

<sup>b</sup> Experiment number.

<sup>c</sup> Reported as repellent to BPH by Lu J. et al. (2014) Mol. Plant. 7, 1670–1682.

<sup>d</sup> Reported as an attractant or repellent to BPH by Xiao, Y. et al. (2012) Ecology Letters, 15(10): 1130–1139.

**Table S2. Rice limonene synthase genes and PCR primers.**

| Gene name | Locus name   | Forward primer        | Reverse primer       | Product (bp) | Reference                                                     |
|-----------|--------------|-----------------------|----------------------|--------------|---------------------------------------------------------------|
| Osubq5    | Os01g0328400 | ACCACTTCGACCGCCACTACT | ACGCCTAAGCCTGCTGGTT  | 69           | Jain et al. (2006) BBRC 345: 646–651                          |
| OsTPS19   | Os04g0340300 | CACGAGGTTGCTCTCCACTT  | GACAAGGAGGTGAGCTGCAT | 161          | Chen et al. (2018) Plant Biotechnology Journal 16, 1778–1787. |
| OsTPS20   | Os04g0341500 | same as OsTPS19       | same as OsTPS19      | 161          | Lee et al. (2016) Protoplasma 253(3):683-690.                 |

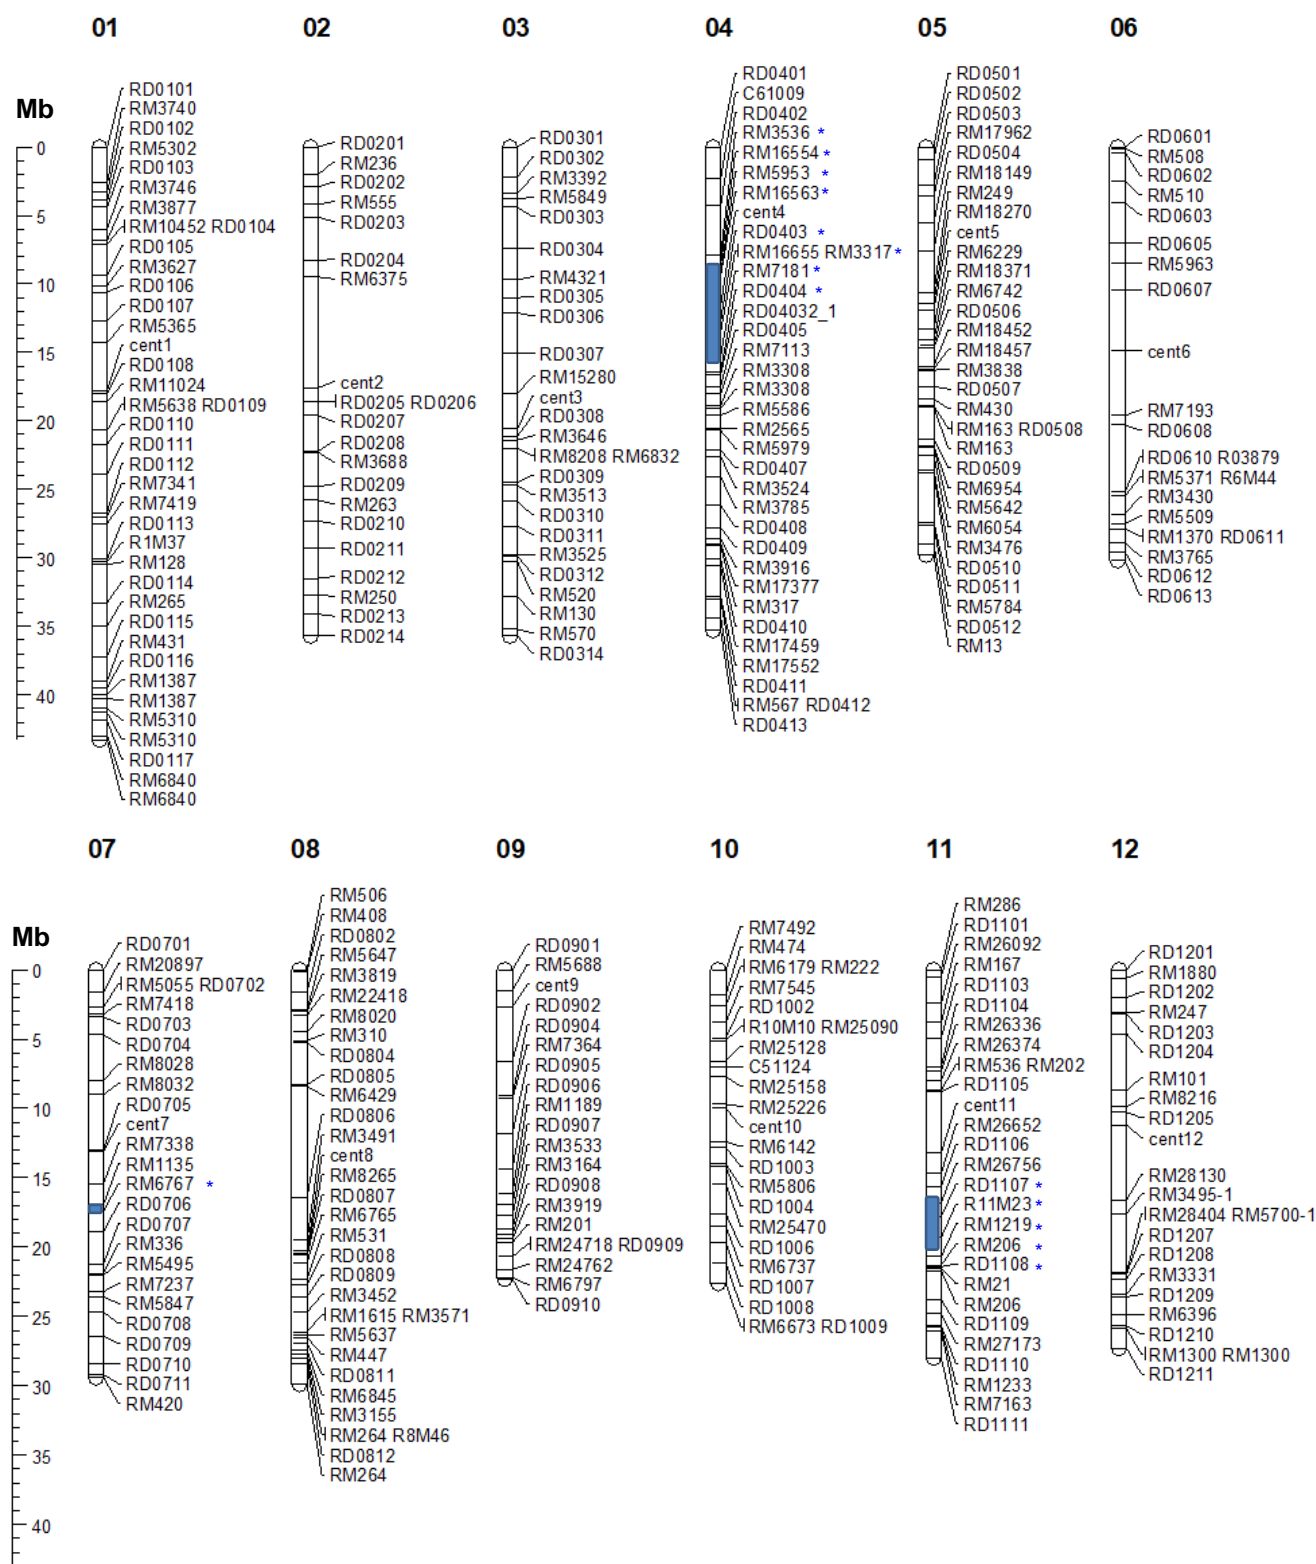

**Figure S1. Chromosome-wise characterization of the recurrent genome recovery of TNG71-Bph45.** 134 InDel (RD as prefixes) and 173 SSR (RM as prefixes) markers were identified by parental polymorphism survey between 'TNG71' and 'Oryza nivara (IRGC 102165)', and were used to evaluate the recurrent genome recovery of TNG71-Bph45. All markers were assigned to the linkage map of Nipponbare /Kasalath based on the primer sequences of markers by blasting against PACs/BACs, which were integrated into the linkage map by IRGSP. Cent\* indicate centromere. Chromosomal regions and markers which polymorphic between TNG71-Bph45 and TNG71 were indicated by blue boxes and blue stars, respectively.

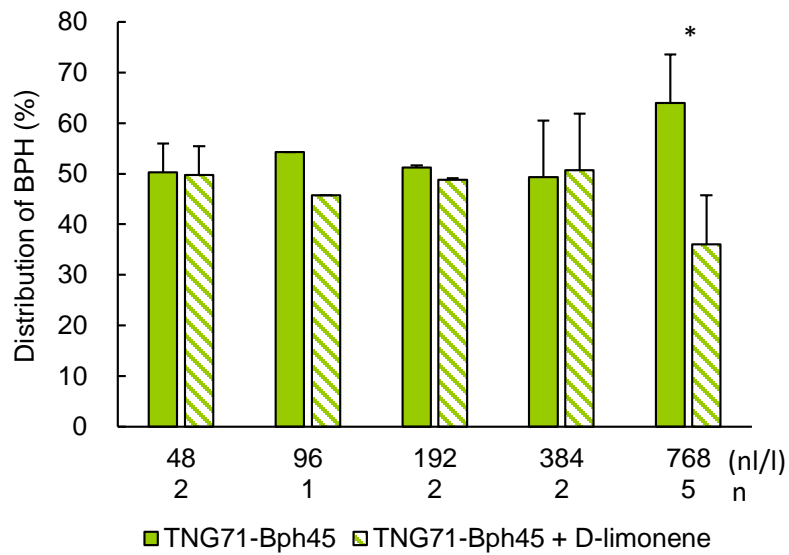

**Figure S2. Repellence of BPH by limonene in Y-maze tests.**

As in Figure 2, the relative distribution of BPH in a Y-maze test was determined using various amounts of D-limonene in the presence of TNG71-*Bph45* rice. Results of independent replicates (as indicated) were analyzed using Student's paired *t*-test. \* $p < 0.05$ , \*\* $p < 0.01$ .

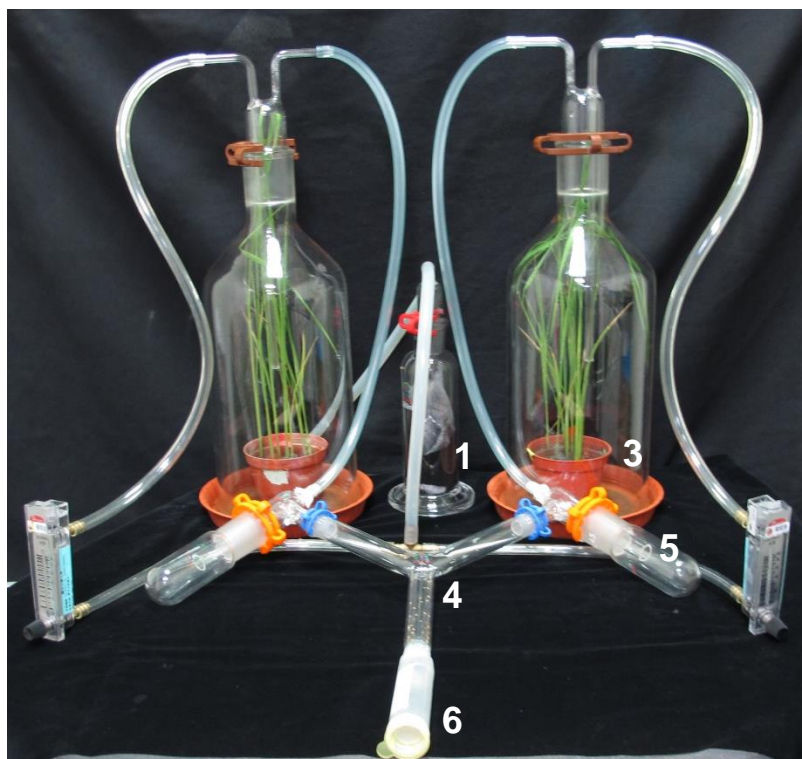

- 1: Charcoal filter (connected to the air pump)
- 2: Air control valve
- 3: Plant VOC
- 4: Y tube
- 5: BPH trap
- 6: BPH source

**Figure S3. Y-maze olfactometer.**

The air was supplied from #1 to #6 and was controlled by the valve (#2).
